# Supplementary material for: Wnt signalling in osteoblasts regulates expression of the receptor activator of NFκB ligand and inhibits osteoclastogenesis in vitro
Source: Oxford University Press journal article supplement (doi:10.1242/jcs.02883), 2006-03-08
Supplement: jcs02883tabs1pdf.pdf [file jcs02883tabs1pdf.pdf]

## Supplementary Table

**Table S1.** Oligonucleotide primers used for RT-PCR analysis of Wnt signalling components in osteoblasts. Sequences, GenBank accession numbers, primer binding sites, product size and annealing temperatures are shown.

| Primer    | Sequence                                                             | Genbank Accession | Position               | Size (bp) | Annealing Temperature |
|-----------|----------------------------------------------------------------------|-------------------|------------------------|-----------|-----------------------|
| Wnt-2     | F 5'-lgggtgacatgagagctacaggtg-3'<br>R 5'-ccccattgtacttctccagagata-3' | BC029854          | 131-155<br>773-749     | 776       | 60C                   |
| Wnt-2b2   | F 5'-lgggtgacatgagagctacaggtg-3'<br>R 5'-ccccattgtacttctccagagata-3' | NM 003391         | 373-397<br>991-1015    | 643       | 60C                   |
| Wnt-3a    | F 5'-aagcaggctctggcagcta-3'<br>R 5'-gacgggtggtgcagttcca-3'           | NM 033131         | 118-137<br>334-351     | 234       | 60C                   |
| Wnt-4     | F 5'-gaggagacgtgcgagaaactcaa-3'<br>R 5'-atcctgaccactggaagccctgt-3'   | AF316543          | 162-184<br>485-507     | 346       | 60C                   |
| Wnt-5a    | F 5'-ttttctcttcccaggtgt-3'<br>R 5'-ggctcatgggtccaccac-3'             | NM 003392         | 809-831<br>1148-1166   | 358       | 60C                   |
| Wnt-10a   | F 5'-gctcctgttcttctactgctgt-3'<br>R 5'-cgccgcatgttctccatcac-3'       | NM 025216         | 535-558<br>1223-1242   | 708       | 60C                   |
| Wnt-11    | F 5'-acaacctcagctaccggctct-3'<br>R 5'-ccaacctctcattctcagtc-3'        | NM 004626         | 599-620<br>971-992     | 394       | 60C                   |
| Fzd-2     | F 5'-ccatctatctcagctacaagttct-3'<br>R 5'-gcagccctctctgtgtg-3'        | NM 001466         | 754-779<br>1095-1113   | 360       | 60C                   |
| Fzd-3     | F 5'-tcccctctgctctatgtgtgag-3'<br>R 5'-gctgctcacttctgtgtga-3'        | NM 017412         | 1609-1632<br>2211-2030 | 622       | 60C                   |
| Fzd-4     | F 5'-ctcggtacaacgtgaccaagat-3'<br>R 5'-aatafatggggcgctcaggga-3'      | NM 012193         | 472-494<br>1054-1076   | 605       | 60C                   |
| Fzd-5     | F 5'-tgcaccgctgctcctcag-3'<br>R 5'-ccatgcccgaagtagaccag-3'           | NM 003468         | 1049-1069<br>1346-1367 | 319       | 60C                   |
| Fzd-6     | F 5'-ttttctctgtgcaactgttca-3'<br>R 5'-agccaattcgtgtgagcttttg-3'      | NM 003506         | 880-904<br>1658-1680   | 801       | 60C                   |
| sFRP-1    | F 5'-cgatctcagctactgagctcca-3'<br>R 5'-tcttctctgggacaattctct-3'      | NM 003012         | 395-418<br>965-990     | 596       | 60C                   |
| sFRP-2    | F 5'-cgacttctcacaagcagca-3'<br>R 5'-cagcgtctctcactgca-3'             | XM050625          | 325-348<br>588-606     | 282       | 60C                   |
| sFRP-3    | F 5'-ctcatcaagctaccctctgt-3'<br>R 5'-ccggaataggctctgtgagctc-3'       | NM 001463         | 575-597<br>759-784     | 210       | 60C                   |
| sFRP-4    | F 5'-gcacatgcctggaacatcac-3'<br>R 5'-atctcatgagggctcagtc-3'          | NM 003014         | 336-356<br>557-578     | 243       | 60C                   |
| sFRP-5    | F 5'-agatgtctcactgccacaagttc-3'<br>R 5'-attcttctctccagcgtgagac-3'    | NM 003015         | 624-646<br>1022-1045   | 422       | 60C                   |
| ?-catenin | F 5'-gctgattgatggagttgacatgg-3'<br>R 5'-gccaaacgtggacattagtg-3'      | NM 001904         | 227-251<br>570-591     | 365       | 60C                   |
| APC       | F 5'-tccacaacatcattcactcacag-3'<br>R 5'-tgctcgcacaagacaattcc-3'      | NM 000038         | 1198-1220<br>1684-1703 | 501       | 60C                   |
| GSK3?     | F 5'-cagcagcctcagctttgg-3'<br>R 5'-ccggaacatagctcagcaccag-3'         | NM 002093         | 284-303<br>620-641     | 358       | 60C                   |
| Groucho   | F 5'-cttttccccgacgcccctc-3'<br>R 5'-ccaagcctgacgagcccttc-3'          | M99435            | 1404-1426<br>1533-1555 | 151       | 65C                   |
| Ctbp1     | F 5'-gttcaaacctccgcatctgt-3'<br>R 5'-atctccgtgcccctctctc-3'          | NM 001328         | 313-336<br>1032-1053   | 740       | 65C                   |
| TCF-1     | F 5'-accagcgcatgtacaagag-3'<br>R 5'-ttcaggtgctggaagggc-3'            | HSTCF1A           | 71-91<br>472-492       | 421       | 65C                   |
| TCF-2     | F 5'-ttccaccatcccagagac-3'<br>R 5'-ctgagctcagctgcalltag-3'           | NM 016269         | 1047-1067<br>1491-1509 | 462       | 65C                   |
| TCF-3     | F 5'-gaaatcaccagtcacgtgaaa-3'<br>R 5'-accaggtggtagagctg-3'           | AB031046          | 1047-1067<br>1491-1509 | 462       | 65C                   |
| TCF-4     | F 5'-ccatcaccgcaacattgtc-3'<br>R 5'-actatggtgagccgacatc-3'           | HSBCTCF4          | 770-790<br>1217-1237   | 467       | 65C                   |
